# Supplementary material for: Prognostic significance of epidermal growth factor receptor and programmed cell death-ligand 1 co-expression in esophageal squamous cell carcinoma
Source: publisher site journal article supplement (doi:10.18632/aging.204535), 2023-02-20
Supplement: Supplementary file [file aging-v15i4-204535-supplementary-material-SD1.pdf]

## SUPPLEMENTARY FIGURES

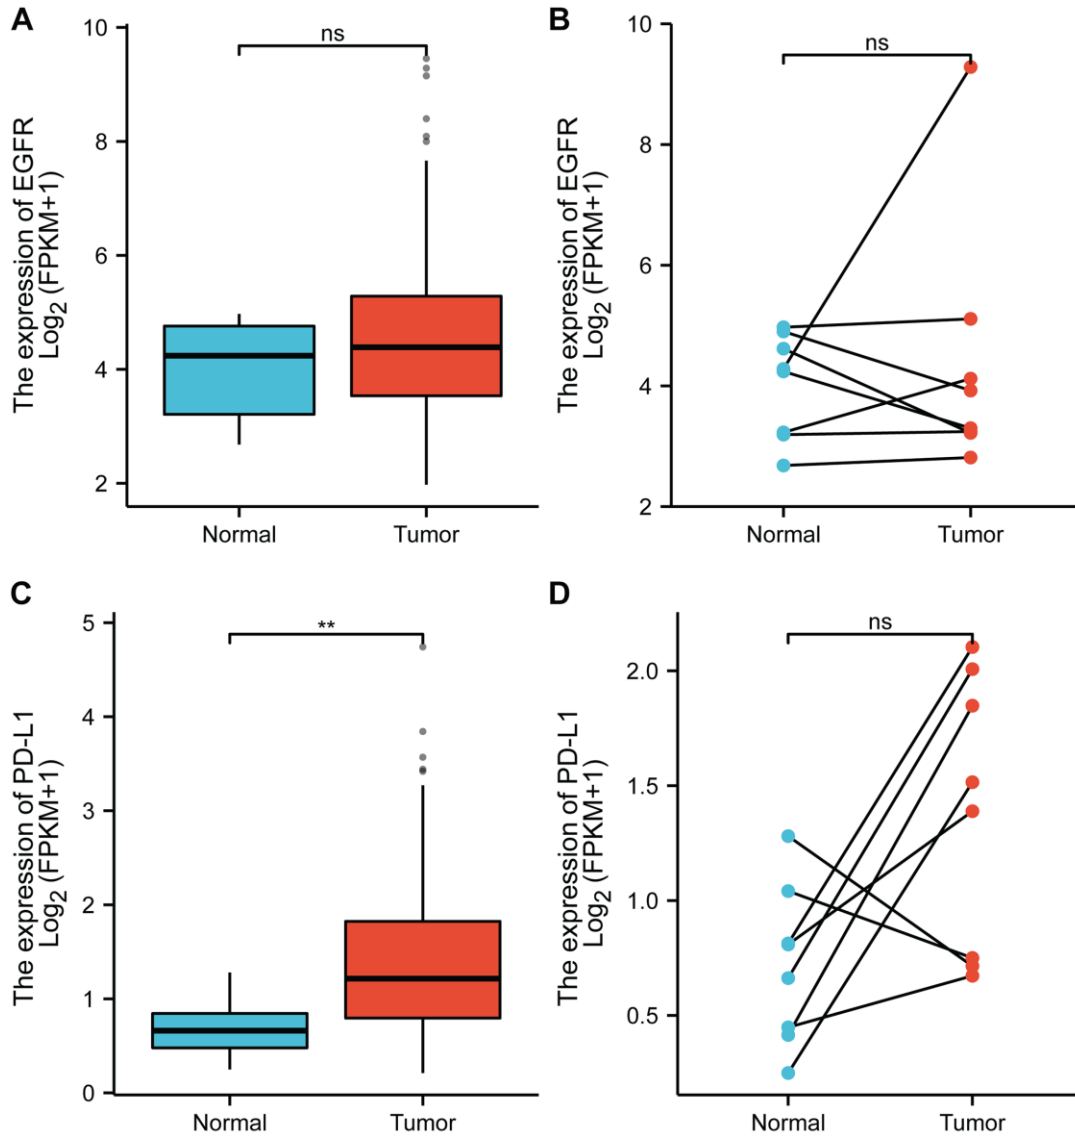

**Supplementary Figure 1. Differential expression analysis of EGFR and PD-L1 in normal and ESCC tissues.** Differential expression of EGFR in unpaired (A) and paired ESCC samples and corresponding normal samples (B). Differential expression of PD-L1 in unpaired (C) and paired ESCC samples and corresponding normal samples (D). \*\*\* represents  $P < 0.001$ .

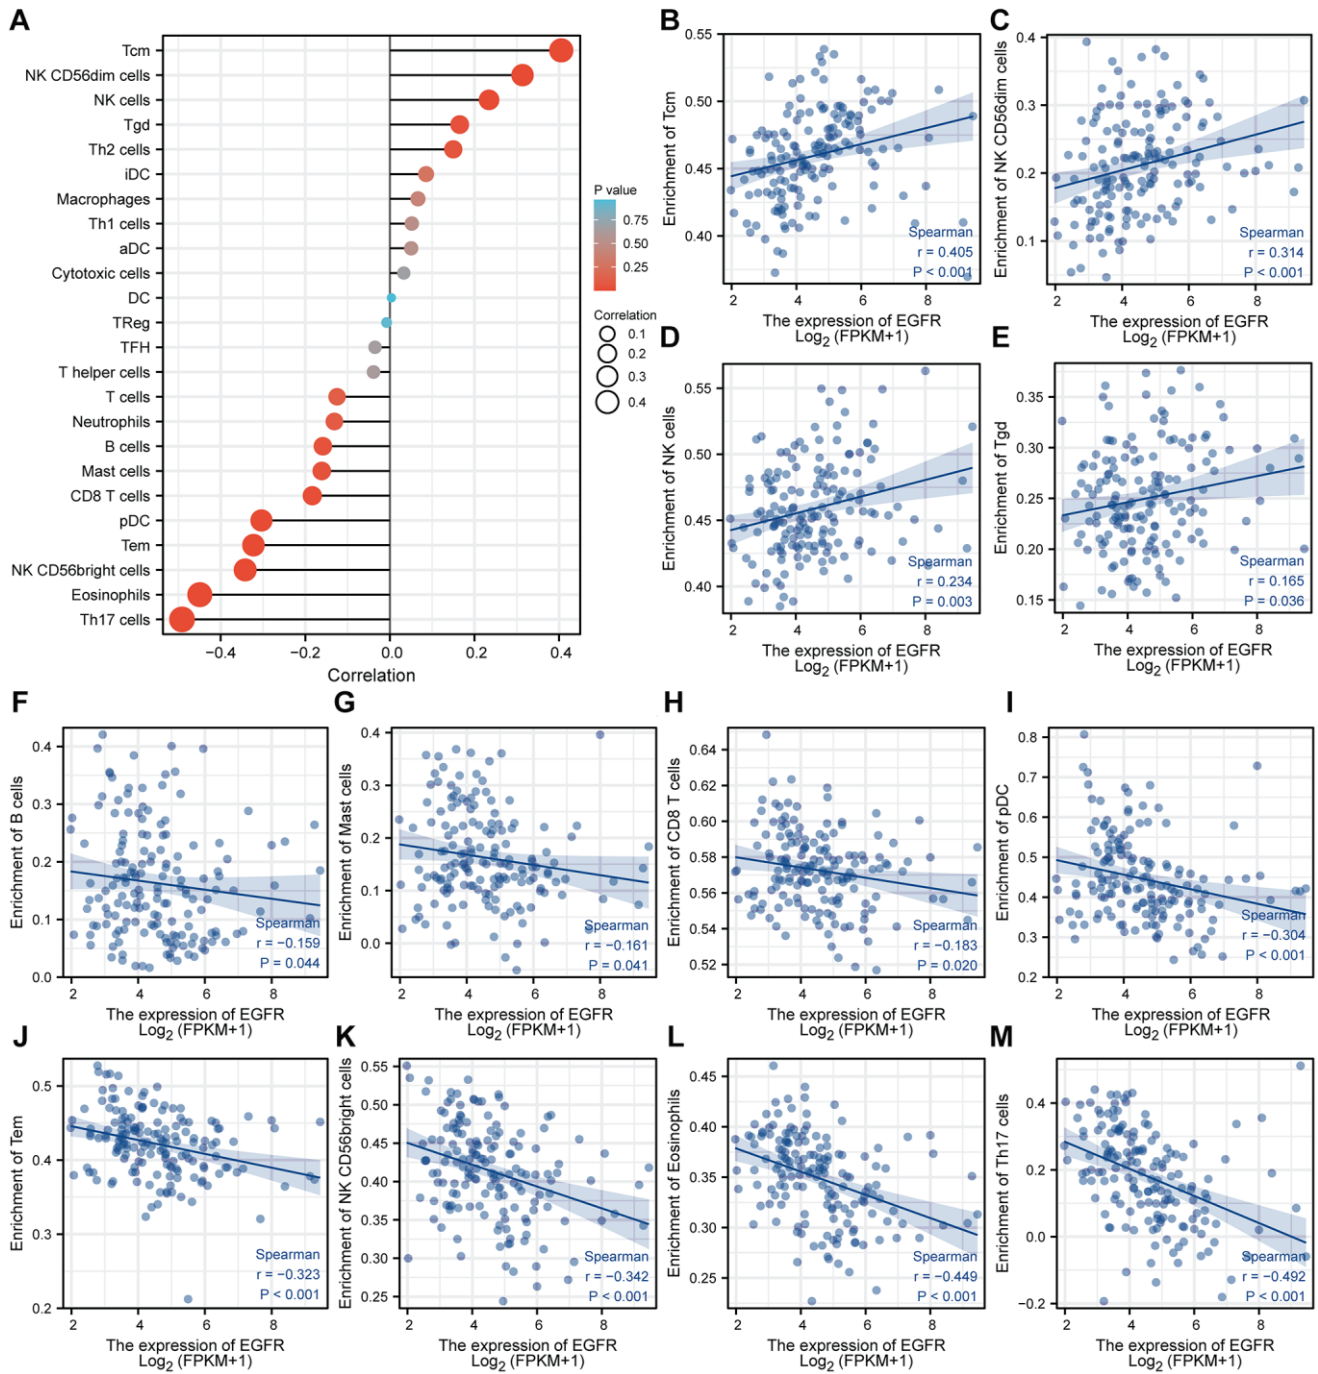

**Supplementary Figure 2. Correlation analysis of EGFR expression and immune cell infiltration in ESCC.** (A) Lollipop plot showing the correlation between EGFR expression and the level of infiltration of 24 immune cells. (B–M) 12 immune cell infiltration levels have a significant correlation with EGFR expression. (B) Tcm, (C) NK CD56dim cells, (D) NK cells, (E) Tgd, (F) B cells, (G) Mast cells, (H) CD8 T cells, (I) pDC, (J) Tem, (K) NK CD56bright cells, (L), Eosinophils, (M) Th17 cells. A positive value of the correlation coefficient ( $r$ ) indicates a positive relationship between the two variables, and on the contrary, a negative value indicates a negative relationship. Abbreviations: EGFR: Epidermal Growth Factor Receptor; ESCC: Esophageal Squamous Cell Carcinoma; Tcm: T central memory; NK: Natural Killer cells; Tgd: T gamma delta; pDC: Plasmacytoid DC; Tem: T effector memory; Th17: T helper 17.

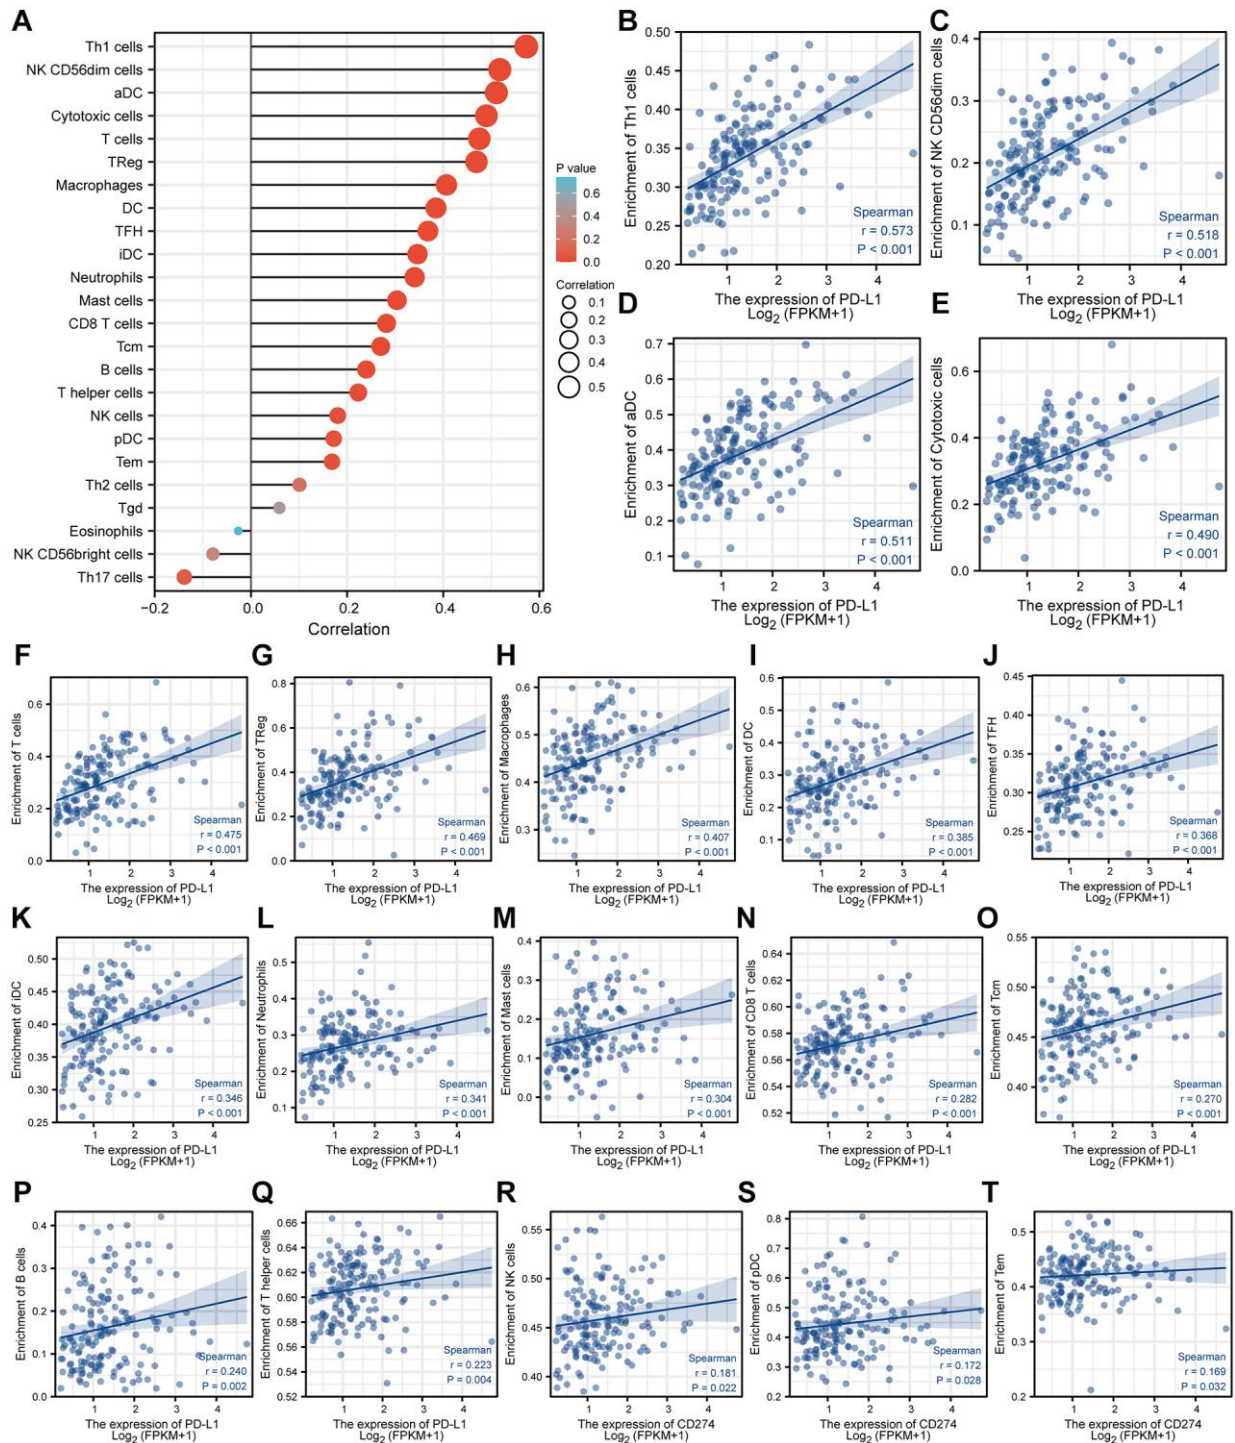

**Supplementary Figure 3. Correlation analysis of PD-L1 expression and immune cell infiltration in ESCC.** (A) Lollipop plot showing the correlation between PD-L1 expression and the level of infiltration of 24 immune cells. (B–T) 19 immune cell infiltration levels have a significant positive correlation with PD-L1 expression. (B) Th1 cells, (C) NK CD56dim cells, (D) Cytotoxic cells, (E) aDC, (F) T cells, (G) Treg, (H) Macrophages, (I) DC, (J) iDC, (K) TFH, (L) neutrophils, (M) Mast cells, (N) CD8 T cells, (O) Tcm, (P) B cells, (Q) T helper cells, (R) NK cells, (S) pDC, (T) Tem. A positive value of the correlation coefficient ( $r$ ) indicates a positive relationship between the two variables, and on the contrary, a negative value indicates a negative relationship. Abbreviations: PD-L1: programmed death-ligand 1; ESCC: Esophageal Squamous Cell Carcinoma; aDC: Dendritic cells; DC: Dendritic cells; iDC: immature Dendritic cells; Tfh: T follicular helper; Tcm: T central memory; NK: Natural Killer cells; pDC: Plasmacytoid DC; Tem: T effector memory.
