# Supplementary material for: Prognostic significance of epidermal growth factor receptor and programmed cell death-ligand 1 co-expression in esophageal squamous cell carcinoma
Source: publisher site journal article supplement (doi:10.18632/aging.204535), 2023-02-20
Supplement: Supplementary file [file aging-v15i4-204535-supplementary-material-SD5.pdf]

Supplementary Document 4. The detailed correlation analysis between EGFR expression and individual immune cell infiltration levels by the Spearman method.

The detailed correlation analysis between EGFR expression and individual immune cell infiltration levels by the Spearman method as follows:

```
library(limma)
library(ggplot2)
library(ggpubr)
library(ggExtra)

gene="EGFR"
pFilter=0.05
expFile="symbol.txt"
setwd("C:\\bio\\Gene\\17.cor")

rt=read.table(expFile, header=T, sep="\t", check.names=F)
rt=as.matrix(rt)
rownames(rt)=rt[,1]
exp=rt[,2:ncol(rt)]
dimnames=list(rownames(exp), colnames(exp))
data=matrix(as.numeric(as.matrix(exp)), nrow=nrow(exp),
dimnames=dimnames)
data=avereps(data)
data=data[rowMeans(data)>1,]

group=sapply(strsplit(colnames(data), "\\-"), "[", 4)
group=sapply(strsplit(group, ""), "[", 1)
group=gsub("2", "1", group)
data=data[,group==0]
data=log2(data+1)

x=as.numeric(data[gene,])
outTab=data.frame()
for(j in rownames(data)){
  if(gene==j){next}
  y=as.numeric(data[j,])
  corT=cor.test(x, y, method = 'Spearman')
  cor=corT$estimate
  pvalue=corT$p.value
  outTab=rbind(outTab, cbind(Query=gene, Gene=j, cor, pvalue))
  if((abs(cor)>corFilter) & (pvalue<pFilter)){
    df1=as.data.frame(cbind(x, y))
    p1=ggplot(df1, aes(x, y)) +
      xlab(paste0(gene, " expression"))+ ylab(paste0(j, "
expression"))+
      geom_point()+ geom_smooth(method="lm", formula=y~x) +
```

```
theme_bw()+
  stat_cor(method = 'pearson', aes(x =x, y =y))
  pdf(file=paste0("cor.", j, ".pdf"), width=5, height=4.6)
  print(p1)
  dev.off()
}
}

write.table(file="corResult.txt", outTab, sep="\t", quote=F,
row.names=F)
outTab=outTab[abs(as.numeric(outTab$cor))>corFilter &
as.numeric(outTab$pvalue)<pFilter, ]
write.table(file="corSig.txt", outTab, sep="\t", quote=F, row.names=F)
```
