# Supplementary material for: Prognostic significance of epidermal growth factor receptor and programmed cell death-ligand 1 co-expression in esophageal squamous cell carcinoma
Source: publisher site journal article supplement (doi:10.18632/aging.204535), 2023-02-20
Supplement: Supplementary file [file aging-v15i4-204535-supplementary-material-SD7.pdf]

Supplementary Document 6. The detailed calculation process of EGFR and PD-L1 immune cell infiltration in ESCC.

```
# library(tidyverse)
library(GSVA)
library(clusterProfiler)
library(org.Hs.eg.db)
library(data.table)
library(rtracklayer)

### ssGSEA #####
## table S1 - https://doi.org/10.1016/j.immuni.2013.10.003
## pdf -> table -> read
immunity <- read.csv("~/immunity-cell-gene.csv", header = T)
#   CellType AffymetrixID Symbol Gene.Symbol ENTREZ_GENE_ID
# 1      aDC    205569_at  LAMP3      LAMP3      27074
# 2      aDC    207533_at  CCL1      CCL1      6346
# 3      aDC    210029_at  INDO      IDO1      3620
# 4      aDC    218400_at  OAS3      OAS3      4940
# 5      aDC    219424_at  EB13      EB13      10148
# 6 B cells    204836_at  GLDC      GLDC      2731

idx <- !immunity$CellType %in% c("Blood vessels", "Normal mucosa", "
cancer cells", "Lymph vessels")
immunity <- immunity[idx,]
immunity <- immunity %>%
  split(., .$CellType) %>%
  lapply(., function(x) (x$ENTREZ_GENE_ID))
immunity <- lapply(immunity, unique)

## Ensembl download
anno <- import("~/Homo_sapiens.GRCh38.101.gtf")
anno <- as.data.frame(anno)
anno <- anno[!duplicated(anno$gene_id),]

anno <- merge(anno, gene_symbol, by = "gene_name")
anno <- rbind(anno, data.frame(gene_name = c("KIAA1324", "IGHA1"),
                             gene_id    = c("ENSG00000116299",
"ENSG00000211895"),
                             ENTREZID = c("57535", "3492")))
anno <- anno[!duplicated(anno$gene_id),] ### 37417
anno <- anno[, c("gene_id", "ENTREZID")]

data <- fread("~/tpm.txt") %>%
  rename("gene_id" = "V1") %>%
  left_join(., anno, by = "gene_id") %>%
```

```

filter(!is.na(ENTREZID)) %>%
select(-gene_id) %>%
column_to_rownames("ENTREZID")
data <- log2(data + 1)

immu_cell <- as.data.frame(gsva(as.matrix(data), immunity, method =
"ssgsea"))

### bbt plot
data <- read.table("~/file.txt", header = T)
#      group      aDC      B cells CD8 T cells Cytotoxic cells
# 1 1.13092315 0.4709550 0.26202395 0.5944611 0.5130117
# 3 0.55644003 0.1800251 -0.07081909 0.5197230 0.2135559
# 4 0.44696904 0.3350859 0.05579749 0.5908900 0.3135561
# 5 0.05474605 0.1191767 0.02578815 0.5541712 0.2068595
# 7 0.61364297 0.1563856 0.09869185 0.5518254 0.2321028
# 8 0.41079217 0.4588979 0.50105493 0.5996277 0.4866508

datal <- NULL
for(i in 2:25){
  cor <- cor.test(data[,i], data[,1], method = "pearson")
  datal <- rbind(datal,
                data.frame("group" = "a",
                           "cell" = colnames(data)[i],
                           "cor" = cor$estimate,
                           "p" = cor$p.value))
}
datal <- datal[order(datal$cor),]
datal$cell <- factor(datal$cell, levels = datal$cell)

ggplot(datal, aes(x = cell, y = cor)) +
  geom_segment(aes(xend=cell, yend=0)) +
  geom_hline(yintercept = 0) +
  geom_point(aes(col=p, fill = p, size=abs(cor))) +
  coord_flip()

```
